# Supplementary material
Source: publisher site journal article supplement (https://neobiota.pensoft.net/article/76515/download/suppl/31/)
Supplement: Supplementary file 1

## SUPPLEMENTARY MATERIAL

### **A low-cost, durable, submersible light trap and customizable LED design for pelagic deployment and capture of fish parasite *Salmincola* sp. copepodids**

Christina A. Murphy<sup>1\*</sup>, William Gerth<sup>1</sup>, Travis Neal<sup>1</sup>, Ivan Arismendi<sup>1</sup>

<sup>1</sup>Oregon State University, Department of Fisheries and Wildlife, Corvallis, Oregon 97331, USA

\*Correspondence: [christina.a.murphy@gmail.com](mailto:christina.a.murphy@gmail.com)

Contents:

**Table S1.** List of materials used to construct light traps and deployment strings.

**Table S2.** Laboratory captures in light trap development.

**Table S3.** Additional materials used for microcontroller programmed lights in series.

**Figure S1.** Wiring diagrams.

**Figure S2.** Prototype light configuration with Arduino and firmware code (.ino) for varying the light intensity in series.

**Table S1.** List of materials used to construct light traps and deployment strings. The brands and suppliers used are included for ease of component identification and do not represent endorsement. Components were often available locally for lower prices. Because traps deployed at depths < 30 m can be less expensive to construct, materials are designated as *deep* or *shallow* when they differ for the two designs. Cost is approximate per trap based on online ordering (as of 2019) and may represent bulk pricing (see notes). Non-consumable equipment used in construction is listed below\*.

| Component                          | Quantity               | Description                                                          | Cost    | Brand / Supplier        | Notes                                                                                            |
|------------------------------------|------------------------|----------------------------------------------------------------------|---------|-------------------------|--------------------------------------------------------------------------------------------------|
| <i>Light housing - shallow</i>     |                        |                                                                      |         |                         |                                                                                                  |
| Canning jar with metal lid         | 1                      | Wide mouth 8 oz (237 cc)                                             | \$1.08  | Kerr / Amazon.com       | Sold in pack of 12                                                                               |
| Silicone ring                      | 1                      | Wide mouth silicone sealing rings                                    | \$0.67  | Amazon.com              | Both ring and circle designs work                                                                |
| <i>Light housing - deep</i>        |                        |                                                                      |         |                         |                                                                                                  |
| Canning jar with glass lid         | 1                      | 250ml Le Parfait Super Jar glass lid jar with stainless snap closure | \$6.67  | Le Parfait / Amazon.com | Sold in pack of 6                                                                                |
| <i>Light source</i>                |                        |                                                                      |         |                         |                                                                                                  |
| LED and heatsink                   | 1                      | 445-450nm LED pre-mounted on star heatsink                           | \$0.55  | Led World / Amazon.com  | Sold in pack of 10                                                                               |
| Resistor                           | 1                      | 8.2 Ohm resistor                                                     | \$0.04  | uxcell / Amazon.com     | Sold in pack of 100                                                                              |
| Heatsink                           | 1                      | 3 mm x 30 mm length                                                  | \$0.02  | uxcell / Amazon.com     | Sold in pack of 240                                                                              |
| Wire set and battery holder        | 1                      | 4 x 1.5V AA battery holder with 9V I type snap connector             | \$2.49  | LampVPath / Amazon.com  | Sold in pack of 3                                                                                |
| Batteries                          | 4                      | High capacity (2800mAh) Ni-MH rechargeable AA battery                | \$6.17  | Bonai / Amazon.com      | Sold in pack of 24                                                                               |
| Solder wire                        | -                      | Electrical solder                                                    | ~\$0.01 | Amazon.com              | To connect wires and lights, any electrical solder will work                                     |
| <i>Top lid – shallow</i>           |                        |                                                                      |         |                         |                                                                                                  |
| Flexible PVC lid with metal strap  | 1                      | 4-inch Plastic DWV Flexible Cap                                      | \$4.78  | Fernco / Home Depot     |                                                                                                  |
| Eye screws                         | 4                      | Small metal eye screws                                               | \$0.25  | Amazon.com              | Exact size not important, should avoid piercing lid                                              |
| Wire piece                         | 4 x 6" (0.15 m) length | 18 gauge copper hobby wire                                           | \$0.46  | OOK / Home Depot        | Sold in 25 ft roll                                                                               |
| <i>Top lid – deep</i>              |                        |                                                                      |         |                         |                                                                                                  |
| Flexible PVC lid with metal strap  | 1                      | 4-inch (10.16 cm) Plastic DWV Flexible Cap                           | \$4.78  | Fernco / Home Depot     |                                                                                                  |
| <i>Bottom lid</i>                  |                        |                                                                      |         |                         |                                                                                                  |
| ABS, rigid PVC or flexible PVC lid | 1                      | 4-inch (10.16 cm) PVC cap                                            | \$2.27  | NDS / Home Depot        | Rigid PVC/ABS lids are less prone to funnel detachment. Flexible PVC lid requires a metal strap. |
| Glass funnel                       | 1                      | 75 mm short stem glass funnel                                        | \$2.50  | Cole-Palmer             | Sold in pack of 6                                                                                |

|                                                                                                 |                            |                                                               |                          |                            |                                                                                          |
|-------------------------------------------------------------------------------------------------|----------------------------|---------------------------------------------------------------|--------------------------|----------------------------|------------------------------------------------------------------------------------------|
| Silicone                                                                                        | -                          | Aquarium grade silicone                                       | ~\$0.25                  | Loctite / Amazon.com       | To secure glass funnel to bottom lid                                                     |
| <i>Trap body</i>                                                                                |                            |                                                               |                          |                            |                                                                                          |
| PVC                                                                                             | 1 x 7" (0.18 m) length     | Schedule 40 PVC                                               | \$1.30                   | Home Depot                 | Sold in 10' length (17 traps)                                                            |
| Metal band strap                                                                                | 1                          | 4" (10.16 cm) worm gear clamp                                 | \$1.67                   | Home Depot                 | Must adjust to at least 4.5"                                                             |
| Rope                                                                                            | 3 x 20" (0.5 m) length     | ¼" (0.6 cm) double braid polyester                            | \$0.45                   | Sea-Strand / E-Rigging.com | Sold in 600' reel, any rope type with minimal stretch and sufficient strength would work |
| Carabiner                                                                                       | 1                          | 6 cm aluminum clip                                            | \$0.50                   | Michael Josh / Amazon.com  | Sold in pack of 20                                                                       |
| <i>Trap weight</i>                                                                              |                            |                                                               |                          |                            |                                                                                          |
| Bike tube                                                                                       | 1 x ~21.5" (0.55 m) length | Used bike tube (diameters vary)                               | \$0.00                   | -                          | Available for free from bicycle repair shops                                             |
| Duct tape                                                                                       | Approx. 12" (0.3 m)        | Gorilla tape                                                  | \$0.17                   | Gorilla / Home Depot       | Any water resistant tape should work                                                     |
| Sand                                                                                            | Approx. 350 g              | Play sand                                                     | \$0.07                   | Quikrete / Home Depot      | Sold in 50 lb bags                                                                       |
| <b>TOTAL COST PER TRAP SHALLOW / DEEP</b>                                                       |                            |                                                               | <b>\$25.70 / \$29.91</b> |                            |                                                                                          |
| <i>Anchor</i> <span style="float: right;">optimal anchor design will vary with substrate</span> |                            |                                                               |                          |                            |                                                                                          |
| Concrete                                                                                        | 1                          | 35 lb                                                         | \$1.86                   | Quikrete / Home Depot      | Sold in 80 lb bags                                                                       |
| Eyebolt with nut                                                                                | 1                          | ¼" (.6 cm) or larger, zinc plated with nut                    | \$0.48                   | Home Depot                 | Nut keeps bolt in place in concrete                                                      |
| Concrete form                                                                                   | 1 x 6" (0.15 m) length     | 8" (20.3 cm) x 6" (15.2 cm) tube                              | \$1.88                   | Quikrete / Home Depot      | Sold in 48" length. Cut to 6" for 35 lb anchor                                           |
| <i>Deployment supplies</i>                                                                      |                            |                                                               |                          |                            |                                                                                          |
| Buoy                                                                                            | 1                          | Polyform A-0                                                  | \$27.99                  | Polyform / Amazon.com      |                                                                                          |
| Rope with attachment loops                                                                      | 1                          | 25 m of rope with 6 loops, ¼" (0.6 cm) double braid polyester | \$8.57                   | Sea-Strand / E-Rigging.com | Sold in 600' reel, any rope type with minimal stretch and sufficient strength would work |
| Bucket or tub                                                                                   | 1                          | 20 gallon (75 L) storage tote                                 | \$5.98                   | HDX / Home Depot           | Any container over 9" deep should work well                                              |
| Appropriate mesh filter / sieve                                                                 | 1                          | 106 um test sieve                                             | \$19.99                  | KimLab / Amazon.com        | Use to remove plankton from water when filling traps for placement                       |
| Bait / deterrent (optional)                                                                     | -                          | Trout fin clips                                               | \$0.00                   | -                          | We placed fin clips in unbleached tea bags                                               |
| Screw driver                                                                                    | 1                          | 5/16 socket screwdriver                                       | \$6.99                   | Greenlee / Amazon.com      | For tightening metal straps (worm gear clamps), including securing lid after filling     |
| <b>ASSOCIATED COSTS FOR STRING DEPLOYMENT</b><br>(may be used to deploy multiple traps)         |                            |                                                               | <b>\$73.74</b>           |                            |                                                                                          |

**\*Non-consumable equipment used in construction:** Drill press with 2 ¾" hole saw (for bottom lid hole), handheld jig saw (for notch in deep trap bodies), miter saw (for cutting PVC to length), metal file (for cutting the stems off of funnels), 5/16 socket screwdriver (for metal bands), funnel (for filling tubes with sand)

**Table S2.** Laboratory captures in light trap development. LED S1A and S1B wiring diagrams can be found in Figure S1.

| Trial | Tank            | Light color | Light style        | Light notes        | Trap notes    | Set date  | Pull date | Copepodids (# captured) | Water Temp (°C) | Position in tank | Notes        |
|-------|-----------------|-------------|--------------------|--------------------|---------------|-----------|-----------|-------------------------|-----------------|------------------|--------------|
| 1     | Aquarium        | white       | flash              | LED w/ arduino S1B | opaque PVC    | 1/23/2019 | 1/25/2019 | 0                       | 5.5             |                  |              |
| 1     | Aquarium        | white       | solid              | LED dive light     | opaque PVC    | 1/23/2019 | 1/25/2019 | 1                       | 5.5             |                  |              |
| 2     | Aquarium        | white       | pulse (bright-dim) | LED w/ arduino S1B | opaque PVC    | 1/25/2019 | 1/28/2019 | 25                      | 5.2             |                  |              |
| 2     | Aquarium        | white       | solid              | LED dive light     | opaque PVC    | 1/25/2019 | 1/28/2019 | 41                      | 5.2             |                  |              |
| 3     | Aquarium        | white       | pulse              | LED w/ arduino S1B | opaque PVC    | 1/28/2019 | 1/30/2019 | 41                      | 5.2             |                  |              |
| 3     | Aquarium        | white       | solid              | LED dive light     | opaque PVC    | 1/28/2019 | 1/30/2019 | 63                      | 5.2             |                  |              |
| 4     | Aquarium        | white       | solid              | LED dive light     | opaque PVC    | 2/7/2019  | 2/9/2019  | 28                      | 5.1             |                  |              |
| 4     | Aquarium        | white       | solid              | LED dive light     | clear acrylic | 2/7/2019  | 2/9/2019  | 30                      | 5.1             |                  |              |
| 5     | Aquarium        | white       | solid              | LED dive light     | opaque PVC    | 2/9/2019  | 2/12/2019 | 37                      | 5.1             |                  |              |
| 5     | Aquarium        | white       | solid              | LED dive light     | clear acrylic | 2/9/2019  | 2/12/2019 | 17                      | 5.1             |                  |              |
| 6     | Aquarium        | white       | flash              | LED w/ arduino S1B | opaque PVC    | 2/13/2019 | 2/15/2019 | 28                      | 5.1             |                  |              |
| 6     | Aquarium        | white       | solid              | LED dive light     | opaque PVC    | 2/13/2019 | 2/15/2019 | 54                      | 5.1             |                  |              |
| 7     | Aquarium        | white       | solid              | LED dive light     | opaque PVC    | 2/15/2019 | 2/18/2019 | 86                      | 5.1             |                  |              |
| 7     | Aquarium        | none        | none               | none               | opaque PVC    | 2/15/2019 | 2/18/2019 | 3                       | 5.1             |                  |              |
| 8     | Aquarium        | none        | none               | none               | opaque PVC    | 2/18/2019 | 2/20/2019 | 0                       | 5.1             |                  |              |
| 8     | Aquarium        | white       | solid              | LED dive light     | opaque PVC    | 2/18/2019 | 2/20/2019 | 214                     | 5.1             |                  |              |
| 9     | Aquarium        | white       | solid              | LED S1A            | opaque PVC    | 2/20/2019 | 2/22/2019 | 15                      | 5               |                  |              |
| 9     | Aquarium        | white       | solid              | LED dive light     | opaque PVC    | 2/20/2019 | 2/22/2019 | 8                       | 5               |                  |              |
| 10    | Aquarium        | white       | solid              | LED S1A            | opaque PVC    | 2/25/2019 | 2/27/2019 | 36                      | 5               |                  |              |
| 10    | Aquarium        | white       | solid              | LED dive light     | opaque PVC    | 2/25/2019 | 2/27/2019 | 30                      | 5               |                  |              |
| 11    | Aquarium        | white       | solid              | LED S1A            | opaque PVC    | 3/1/2019  | 3/4/2019  | 151                     | 5               |                  |              |
| 11    | Aquarium        | blue        | solid              | LED pool light     | opaque PVC    | 3/1/2019  | 3/4/2019  | 161                     | 5               |                  | battery died |
| 12    | Aquarium        | white       | solid              | LED S1A            | opaque PVC    | 3/6/2019  | 3/8/2019  | 32                      | 5               |                  |              |
| 12    | Aquarium        | blue        | solid              | LED pool light     | opaque PVC    | 3/6/2019  | 3/8/2019  | 29                      | 5               |                  | battery died |
| 13    | Smith Farm tank | UV          | solid              | LED S1A            | opaque PVC    | 3/29/2019 | 4/1/2019  | 0                       | 12-13           | Left             |              |
| 13    | Smith Farm tank | blue        | solid              | LED S1A            | opaque PVC    | 3/29/2019 | 4/1/2019  | 5                       | 12-13           | Right            |              |
| 13    | Smith Farm tank | white       | solid              | LED S1A            | opaque PVC    | 3/29/2019 | 4/1/2019  | 3                       | 12-13           | Center           |              |
| 14    | Smith Farm tank | UV          | solid              | LED S1A            | opaque PVC    | 4/1/2019  | 4/2/2019  | 0                       | 12-13           | Center           |              |

|    |                 |        |       |                |                        |           |           |    |       |        |              |
|----|-----------------|--------|-------|----------------|------------------------|-----------|-----------|----|-------|--------|--------------|
| 14 | Smith Farm tank | blue   | solid | LED S1A        | opaque PVC             | 4/1/2019  | 4/2/2019  | 2  | 12-13 | Left   |              |
| 14 | Smith Farm tank | violet | solid | LED S1A        | opaque PVC             | 4/1/2019  | 4/2/2019  | 6  | 12-13 | Right  |              |
| 15 | Smith Farm tank | UV     | solid | LED S1A        | opaque PVC             | 4/2/2019  | 4/4/2019  | 2  | 12-13 | Right  |              |
| 15 | Smith Farm tank | blue   | solid | LED S1A        | opaque PVC             | 4/2/2019  | 4/4/2019  | 5  | 12-13 | Center |              |
| 15 | Smith Farm tank | violet | solid | LED S1A        | opaque PVC             | 4/2/2019  | 4/4/2019  | 4  | 12-13 | Left   |              |
| 16 | Smith Farm tank | red    | solid | LED pool light | opaque PVC             | 4/4/2019  | 4/5/2019  | 0  | 12-13 | Right  | battery died |
| 16 | Smith Farm tank | blue   | solid | LED S1A        | opaque PVC             | 4/4/2019  | 4/5/2019  | 1  | 12-13 | Left   |              |
| 16 | Smith Farm tank | violet | solid | LED S1A        | opaque PVC             | 4/4/2019  | 4/5/2019  | 3  | 12-13 | Center |              |
| 17 | Smith Farm tank | yellow | solid | LED pool light | opaque PVC             | 4/5/2019  | 4/8/2019  | 0  | 12-13 | Left   | battery died |
| 17 | Smith Farm tank | blue   | solid | LED S1A        | opaque PVC             | 4/5/2019  | 4/8/2019  | 10 | 12-13 | Right  |              |
| 17 | Smith Farm tank | violet | solid | LED S1A        | opaque PVC             | 4/5/2019  | 4/8/2019  | 4  | 12-13 | Center |              |
| 18 | Smith Farm tank | green  | solid | LED pool light | opaque PVC             | 4/8/2019  | 4/9/2019  | 0  | 12-13 | Center | battery died |
| 18 | Smith Farm tank | blue   | solid | LED S1A        | opaque PVC             | 4/8/2019  | 4/9/2019  | 0  | 12-13 | Left   |              |
| 18 | Smith Farm tank | violet | solid | LED S1A        | opaque PVC             | 4/8/2019  | 4/9/2019  | 0  | 12-13 | Right  |              |
| 19 | Smith Farm tank | yellow | solid | LED pool light | opaque PVC             | 4/9/2019  | 4/12/2019 | 0  | 12-13 | Right  | battery died |
| 19 | Smith Farm tank | blue   | solid | LED S1A        | opaque PVC             | 4/9/2019  | 4/12/2019 | 0  | 12-13 | Center |              |
| 19 | Smith Farm tank | violet | solid | LED S1A        | opaque PVC             | 4/9/2019  | 4/12/2019 | 6  | 12-13 | Left   |              |
| 20 | Smith Farm tank | red    | solid | LED pool light | opaque PVC             | 4/12/2019 | 4/15/2019 | 0  | 12-13 | Center | battery died |
| 20 | Smith Farm tank | blue   | solid | LED S1A        | opaque PVC             | 4/12/2019 | 4/15/2019 | 3  | 12-13 | Left   |              |
| 20 | Smith Farm tank | violet | solid | LED S1A        | opaque PVC             | 4/12/2019 | 4/15/2019 | 7  | 12-13 | Right  |              |
| 21 | Smith Farm tank | green  | solid | LED pool light | opaque PVC             | 4/15/2019 | 4/16/2019 | 1  | 12-13 | Right  | battery died |
| 21 | Smith Farm tank | blue   | solid | LED S1A        | opaque PVC             | 4/15/2019 | 4/16/2019 | 0  | 12-13 | Center |              |
| 21 | Smith Farm tank | violet | solid | LED S1A        | opaque PVC             | 4/15/2019 | 4/16/2019 | 1  | 12-13 | Left   |              |
| 22 | Smith Farm tank | violet | solid | LED S1A        | opaque PVC             | 4/16/2019 | 4/19/2019 | 6  | 12-13 | Right  |              |
| 22 | Smith Farm tank | violet | solid | LED S1A        | opaque PVC             | 4/16/2019 | 4/19/2019 | 6  | 12-13 | Center |              |
| 22 | Smith Farm tank | violet | solid | LED S1A        | opaque PVC + fish bits | 4/16/2019 | 4/19/2019 | 10 | 12-13 | Left   | fish bits    |
| 23 | Smith Farm tank | violet | solid | LED S1A        | opaque PVC             | 4/19/2019 | 4/22/2019 | 3  | 12-13 | Left   |              |

|    |                            |        |       |         |                        |           |           |    |       |        |                                |
|----|----------------------------|--------|-------|---------|------------------------|-----------|-----------|----|-------|--------|--------------------------------|
| 23 | Smith Farm tank            | violet | solid | LED S1A | opaque PVC             | 4/19/2019 | 4/22/2019 | 14 | 12-13 | Right  |                                |
| 23 | Smith Farm tank            | violet | solid | LED S1A | opaque PVC + fish bits | 4/19/2019 | 4/22/2019 | 12 | 12-13 | Center | fish bits                      |
| 24 | Smith Farm tank            | violet | solid | LED S1A | opaque PVC             | 4/22/2019 | 4/25/2019 | 0  | 12-13 | Center |                                |
| 24 | Smith Farm tank            | violet | solid | LED S1A | opaque PVC             | 4/22/2019 | 4/25/2019 | 2  | 12-13 | Left   |                                |
| 24 | Smith Farm tank            | violet | solid | LED S1A | opaque PVC + fish bits | 4/22/2019 | 4/25/2019 | 1  | 12-13 | Right  | fish bits                      |
| 25 | Smith Farm tank            | violet | solid | LED S1A | opaque PVC             | 5/21/2019 | 5/24/2019 | 5  | 12-13 | Right  |                                |
| 25 | Smith Farm tank            | violet | solid | LED S1A | opaque PVC             | 5/21/2019 | 5/24/2019 | 6  | 12-13 | Left   |                                |
| 26 | Aquarium - non-target taxa | violet | solid | LED S1A | opaque PVC             | 5/23/2019 | 5/24/2019 | na | 5     |        | 796 non-target taxa            |
| 26 | Aquarium - non-target taxa | violet | solid | LED S1A | opaque PVC             | 5/23/2019 | 5/24/2019 | na | 5     |        | 700 non-target taxa; fish bits |
| 27 | Aquarium - non-target taxa | violet | solid | LED S1A | opaque PVC             | 5/24/2019 | 5/25/2019 | na | 5     |        | 520 non-target taxa            |
| 27 | Aquarium - non-target taxa | violet | solid | LED S1A | opaque PVC             | 5/24/2019 | 5/25/2019 | na | 5     |        | 196 non-target taxa; fish bits |
| 28 | Smith Farm tank            | violet | solid | LED S1A | opaque PVC             | 6/11/2019 | 6/14/2019 | 7  | 12-13 | Right  |                                |
| 28 | Smith Farm tank            | 420 nm | solid | LED S1A | opaque PVC             | 6/11/2019 | 6/14/2019 | 2  | 12-13 | Left   |                                |
| 29 | Smith Farm tank            | violet | solid | LED S1A | opaque PVC             | 6/14/2019 | 6/17/2019 | 15 | 12-13 | Left   |                                |
| 29 | Smith Farm tank            | 420 nm | solid | LED S1A | opaque PVC             | 6/14/2019 | 6/17/2019 | 19 | 12-13 | Right  |                                |

**Table S3.** Additional materials used for microcontroller programmed lights in series (costs as of 2019).

|                                  |                              |            |       |                                    |
|----------------------------------|------------------------------|------------|-------|------------------------------------|
| Arduino                          | ELEGOO for Arduino Nano V3.0 | Amazon.com | 4.29  | sold in 3 piece                    |
| Mosfet                           | 60V, 500mA                   | Amazon.com | 0.65  | sold in 10 piece                   |
| USB Cable                        | for programming the Arduino  | Monoprice  | 0.77  | can also provide power for testing |
| PCB Board                        | with header connectors       | Amazon.com | ~0.50 | sold in multipiece kits            |
| Additional cables and breadboard |                              | as needed  |       |                                    |

### A. Single constant LED diagram

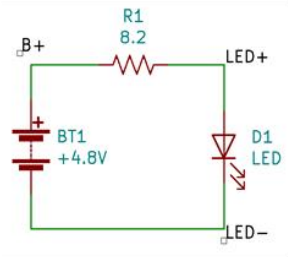

### B. Microcontroller LED diagram

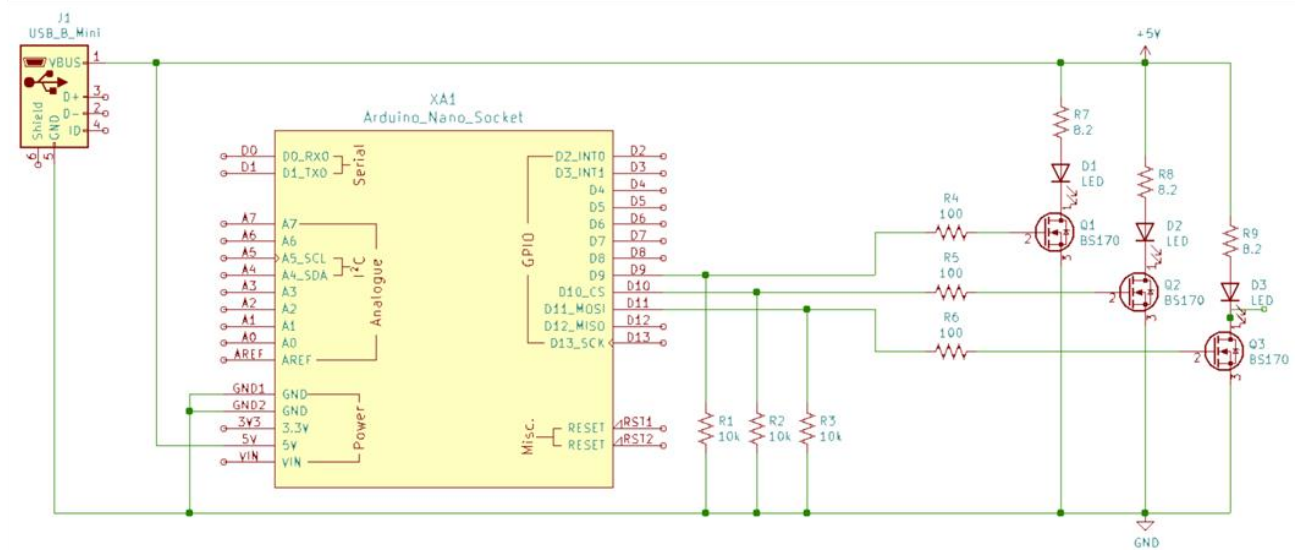

**Figure S1.** Wiring diagrams for **A.)** a single solid LED (left) and **B.)** a microcontroller array with 3 LEDs (right).



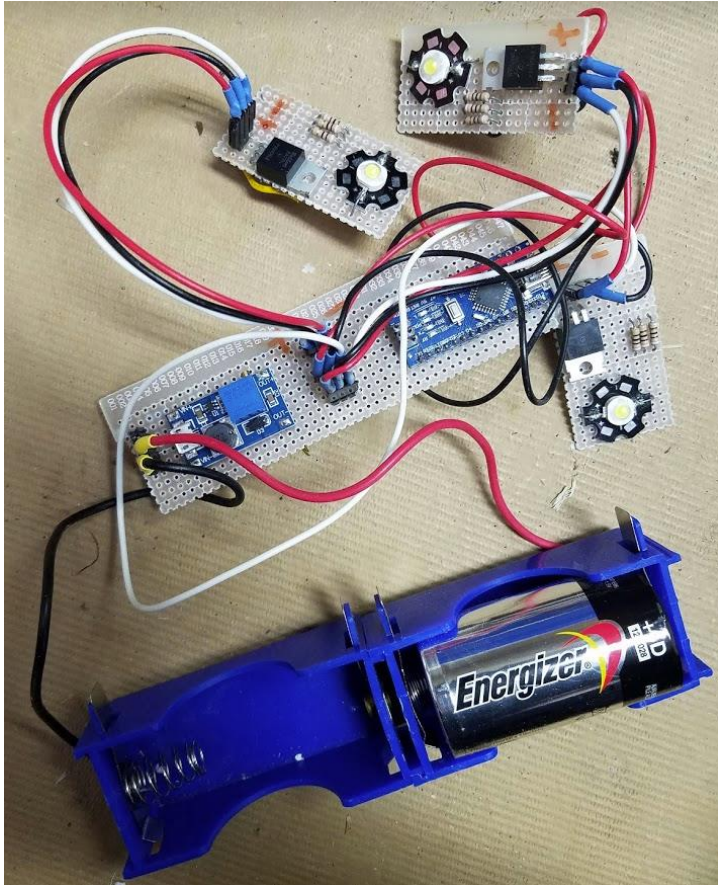

**Figure S2.** Prototype light configuration with Arduino.

**Firmware code (.ino) for varying the light intensity in series:**

```
/*  
Varies the intensity of of three LEDs in a sine wave pattern, using pulse width modulation (PWM)  
*/  
  
int ledPin1 = 9; // LED connected to digital pin 9  
int ledPin2 = 10; // LED connected to digital pin 10  
int ledPin3 = 11; // LED connected to digital pin 11  
  
int period = 3000; // period in milliseconds  
int nsteps = 100;  
int delay_time = period/nsteps;  
float t_step = 2*PI/nsteps;  
  
// offset between the sine wave patterns for each LED, in radians  
float offset = 2*PI/3;  
  
int fadeValue(float t){  
    return min(max((int) 128*sin(t)+128, 0), 255);  
}
```

```
        //return 255;
    }

void setup() {
    // nothing happens in setup
}

void loop() {
    for (float t1 = 0 ; t1 <= 2*PI ; t1 += t_step){
        float t2 = t1 + offset;
        float t3 = t2 + offset;
        analogWrite(ledPin1, fadeValue(t1));
        analogWrite(ledPin2, fadeValue(t2));
        analogWrite(ledPin3, fadeValue(t3));
        delay(delay_time);
    }
}
```
